# Supplementary material for: Elastic particle deformation in rectangular channel flow as a measure of particle stiffness
Source: Royal Society of Chemistry journal article supplement (doi:10.1039/c7sm01829k), 2017-12-11
Supplement: c7sm01829k1.pdf [file c7sm01829k1.pdf]

Supplemental information

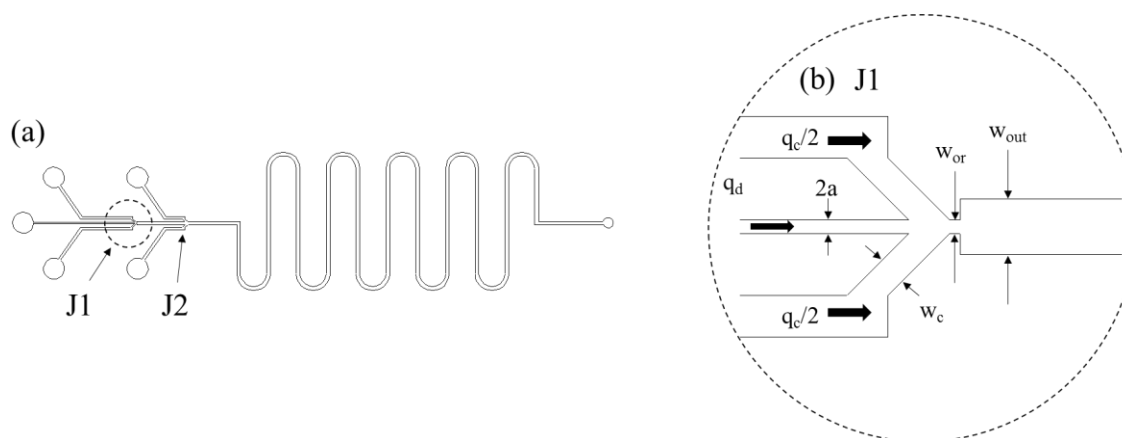

Figure S1. Schematic of (a) the full optimized on-chip particle generation device and (b) the orifice for drop formation at the first junction (J1)

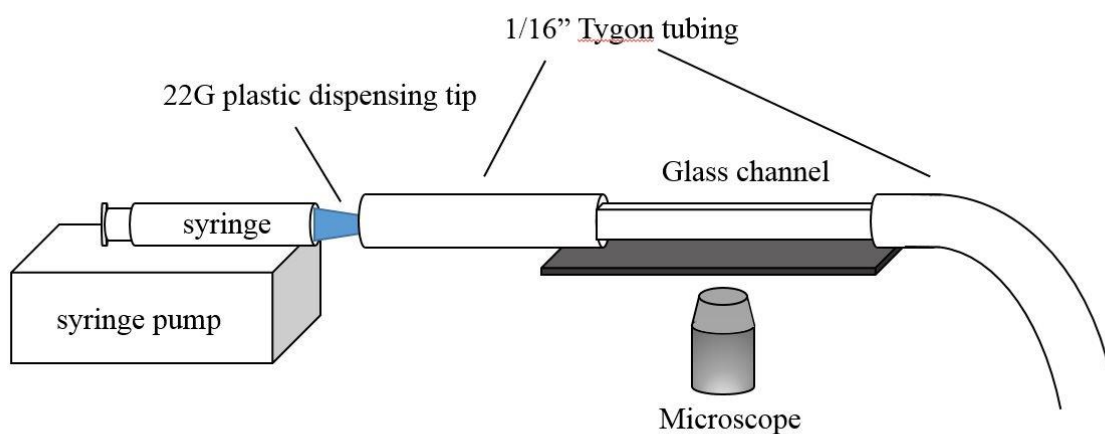

Figure S2. Schematic of experimental set-up for flow experiments
